# Supplementary material
Source: PubMed Central journal article supplement (PMC7039394)
Supplement: NIHMS1550134-supplement-2.pdf [file NIHMS1550134-supplement-2.pdf]

**Supplementary Table: Acute GVHD 2-4; Myeloablative, Sibling donor**

| <i>Parameter</i>                   | <i>N(%)</i>  | <i>Est (95% CI)</i> | <i>P-value</i>  | <i>Overall P-value</i> |
|------------------------------------|--------------|---------------------|-----------------|------------------------|
| <b>GVHD prophylaxis</b>            |              |                     |                 |                        |
| Tac + MTX (reference)              | 1369 (34.9%) | 1.00 (., .)         | .               | <b>0.002</b>           |
| CsA + MMF                          | 114 (2.9%)   | 1.65 (1.24, 2.20)   | <b>&lt;.001</b> |                        |
| CsA + MTX                          | 2218 (56.6%) | 1.17 (1.04, 1.33)   | <b>0.010</b>    |                        |
| Tac + MMF                          | 220 (5.6%)   | 1.05 (0.83, 1.34)   | 0.661           |                        |
| <b>Disease</b>                     |              |                     |                 |                        |
| AML (reference)                    | 1890 (48.2%) | 1.00 (., .)         | .               | <b>&lt;.001</b>        |
| ALL                                | 798 (20.4%)  | 1.24 (1.08, 1.43)   | <b>0.003</b>    |                        |
| CML                                | 842 (21.5%)  | 1.35 (1.17, 1.55)   | <b>&lt;.001</b> |                        |
| MDS                                | 390 (9.9%)   | 1.31 (1.10, 1.56)   | <b>0.003</b>    |                        |
| <b>Donor-recipient sex match</b>   |              |                     |                 |                        |
| M-M (reference)                    | 1277 (32.6%) | 1.00 (., .)         | .               | <b>0.005</b>           |
| F-F                                | 805 (20.5%)  | 0.94 (0.81, 1.10)   | 0.430           |                        |
| F-M                                | 945 (24.1%)  | 1.20 (1.04, 1.37)   | 0.012           |                        |
| M-F                                | 893 (22.8%)  | 1.05 (0.91, 1.21)   | 0.528           |                        |
| Missing                            |              | 8.36 (1.17, 59.94)  | 0.035           |                        |
| <b>Graft type</b>                  |              |                     |                 |                        |
| BM (reference)                     | 794 (20.2%)  | 1.00 (., .)         | .               | <b>&lt;.001</b>        |
| PB                                 | 3127 (79.8%) | 1.50 (1.30, 1.74)   | <b>&lt;.001</b> |                        |
| <b>Karnofsky performance score</b> |              |                     |                 |                        |
| <90 (reference)                    | 1015 (25.9%) | 1.00 (., .)         | .               | <b>0.018</b>           |
| 90-100                             | 2793 (71.3%) | 0.87 (0.77, 0.98)   | 0.027           |                        |
| Missing                            | 112 (2.9%)   | 0.65 (0.45, 0.95)   | 0.026           |                        |

**Pairwise Comparisons**

|                         | <i>HR (95% CI)</i> | <i>P-value</i>  |
|-------------------------|--------------------|-----------------|
| <b>GVHD prophylaxis</b> |                    |                 |
| CsA + MMF vs Tac + MTX  | 1.65 (1.24 - 2.20) | <b>&lt;.001</b> |
| CsA + MMF vs CsA + MTX  | 1.41 (1.06 - 1.86) | 0.017           |
| CsA + MMF vs Tac + MMF  | 1.57 (1.10 - 2.22) | 0.012           |
| CsA + MTX vs Tac + MTX  | 1.17 (1.04 - 1.33) | <b>0.010</b>    |
| CsA + MTX vs Tac + MMF  | 1.11 (0.88 - 1.41) | 0.378           |
| Tac + MMF vs Tac + MTX  | 1.05 (0.83 - 1.34) | 0.661           |

**Supplementary Table: Acute GVHD 3-4; Myeloablative, Sibling donor**

| <i>Parameter</i>                   | <i>N (%)</i> | <i>Est (95% CI)</i>  | <i>P-value</i>   | <i>Overall P-value</i> |
|------------------------------------|--------------|----------------------|------------------|------------------------|
| <b>GVHD prophylaxis</b>            |              |                      |                  |                        |
| Tac + MTX (reference)              | 1369 (35.0%) | 1.00 (., .)          | .                | <b>0.010</b>           |
| CsA + MMF                          | 114 (2.9%)   | 1.92 (1.31, 2.83)    | <b>&lt;0.001</b> |                        |
| CsA + MTX                          | 2202 (56.4%) | 1.13 (0.92, 1.37)    | 0.238            |                        |
| Tac + MMF                          | 220 (5.6%)   | 1.19 (0.85, 1.66)    | 0.319            |                        |
| <b>Disease</b>                     |              |                      |                  |                        |
| AML (reference)                    | 1880 (48.1%) | 1.00 (., .)          | .                | <b>0.001</b>           |
| ALL                                | 795 (20.4%)  | 1.16 (0.95, 1.43)    | 0.154            |                        |
| CML                                | 840 (21.5%)  | 1.41 (1.16, 1.72)    | <b>&lt;.001</b>  |                        |
| MDS                                | 390 (10.0%)  | 1.43 (1.10, 1.82)    | <b>0.006</b>     |                        |
| <b>Donor-recipient sex-match</b>   |              |                      |                  |                        |
| <b>M-M (ref)</b>                   | 1270 (32.5%) | 1.00 (ref)           |                  | <b>0.003</b>           |
| <b>F-F</b>                         | 801 (20.5%)  | 0.92 (0.73, 1.14)    | 0.442            |                        |
| <b>F-M</b>                         | 942 (24.1%)  | 1.22 (1.01, 1.49)    | 0.044            |                        |
| <b>M-F</b>                         | 390 (10.0%)  | 1.05 (0.85, 1.29)    | 0.662            |                        |
| <b>missing</b>                     |              | 21.85 (3.00, 158.91) | <b>0.002</b>     |                        |
| <b>Graft type</b>                  |              |                      |                  |                        |
| BM (reference)                     | 793(20.3%)   | 1.00 (., .)          | .                | <b>&lt;.001</b>        |
| PB                                 | 3113 (79.7%) | 1.57 (1.27, 1.93)    | <b>&lt;.001</b>  |                        |
| <b>Karnofsky performance score</b> |              |                      |                  |                        |
| <90 (reference)                    | 1011 (25.9%) | 1.00 (., .)          | .                | <b>0.021</b>           |
| 90-100                             | 2782 (71.2%) | 0.82 (0.69, 0.97)    | 0.024            |                        |
| Missing                            | 112 (2.9%)   | 0.55 (0.31, 0.97)    | 0.040            |                        |
| <b>Year of transplant</b>          |              |                      |                  |                        |
| 2000-2004 (reference)              | 1747 (44.7%) | 1.00 (., .)          | .                | <b>0.009</b>           |
| 2005-2008                          | 1184 (30.3%) | 0.77 (0.64, 0.93)    | <b>0.007</b>     |                        |
| 2009-2013                          | 975 (25.0%)  | 0.75 (0.60, 0.94)    | 0.013            |                        |

**Pairwise comparisons**

|                         | <i>HR (95% CI)</i> | <i>P-value</i>   |
|-------------------------|--------------------|------------------|
| <b>GVHD prophylaxis</b> |                    |                  |
| CsA + MMF vs Tac + MTX  | 1.92 (1.31 - 2.83) | <b>&lt;0.001</b> |
| CsA + MMF vs CsA + MTX  | 1.71 (1.17 - 2.50) | <b>0.006</b>     |
| CsA + MMF vs Tac + MMF  | 1.62 (1.01 - 2.61) | 0.047            |
| CsA + MTX vs Tac + MTX  | 1.13 (0.92 - 1.37) | 0.238            |
| CsA + MTX vs Tac + MMF  | 0.95 (0.68 - 1.34) | 0.766            |
| Tac + MMF vs Tac + MTX  | 1.19 (0.85- 1.66)  | 0.319            |

**Supplementary Table: Chronic GVHD; Myeloablative, Sibling donor**

| <i>Parameter</i>                      | <i>N(%)</i>  | <i>Est (95% CI)</i> | <i>P-value</i>  | <i>Overall P-value</i> |
|---------------------------------------|--------------|---------------------|-----------------|------------------------|
| <b>GVHD prophylaxis &lt; 5 months</b> |              |                     |                 |                        |
| Tac+MTX                               |              | 1.00(., .)          | .               | <b>0.001</b>           |
| CSA+MMF                               |              | 1.34 (0.83, 2.17)   | 0.233           |                        |
| CSA+MTX                               |              | 1.41 (1.20, 1.67)   | <b>&lt;.001</b> |                        |
| Tac+MMF                               |              | 1.28 (0.94, 1.74)   | 0.119           |                        |
| <b>GVHD prophylaxis ≥ 5 months</b>    |              |                     |                 |                        |
| Tac+MTX                               |              | 1.00(., .)          | .               | <b>0.0001</b>          |
| CSA+MMF                               |              | 0.56 (0.34, 0.95)   | 0.030           |                        |
| CSA+MTX                               |              | 0.74 (0.65, 0.85)   | <b>&lt;.001</b> |                        |
| Tac+MMF                               |              | 0.92 (0.71, 1.19)   | 0.512           |                        |
| <b>Age at transplant, years</b>       |              |                     |                 |                        |
| 18-29 (reference)                     | 924 (23.7%)  | 1.00 (., .)         |                 | <b>&lt;.001</b>        |
| 30-39                                 | 793 (20.3%)  | 1.19 (1.03, 1.38)   | 0.022           |                        |
| 40-49                                 | 1040 (26.7%) | 1.21 (1.05, 1.39)   | <b>0.009</b>    |                        |
| 50-64                                 | 1087 (27.9%) | 1.38 (1.19, 1.59)   | <b>&lt;.001</b> |                        |
| 65+                                   | 53 (1.4%)    | 0.83 (0.51, 1.35)   | 0.445           |                        |
| <b>Disease</b>                        |              |                     |                 |                        |
| AML (reference)                       | 1883 (48.3%) | 1.00 (., .)         |                 | <b>&lt;.001</b>        |
| ALL                                   | 796 (20.4%)  | 1.15 (1.01, 1.30)   | 0.040           |                        |
| CML                                   | 829 (21.3%)  | 1.21 (1.06, 1.37)   | <b>0.004</b>    |                        |
| MDS                                   | 389 (10.0%)  | 1.40 (1.19, 1.63)   | <b>&lt;.001</b> |                        |
| <b>Donor-recipient sex match</b>      |              |                     |                 |                        |
| M-M (reference)                       | 1266 (32.5%) | 1.00 (., .)         |                 | <b>&lt;.001</b>        |
| F-F                                   | 803 (20.6%)  | 1.27 (1.11, 1.45)   | <b>&lt;.001</b> |                        |
| F-M                                   | 945 (24.2%)  | 1.71 (1.51, 1.94)   | <b>&lt;.001</b> |                        |
| M-F                                   | 883 (22.7%)  | 1.05 (0.92, 1.21)   | 0.468           |                        |
| <b>Graft type</b>                     |              |                     |                 |                        |
| BM (reference)                        | 784 (20.1%)  | 1.00 (., .)         |                 | <b>&lt;.001</b>        |
| PB                                    | 3113 (79.9%) | 1.62 (1.42, 1.86)   | <b>&lt;.001</b> |                        |

**Pairwise Comparisons**

|                                 | <i>HR 95% CI</i>  | <i>P-value</i> |
|---------------------------------|-------------------|----------------|
| CsA+ MMF vs.CsA+MTX < 5 months  | 0.95 (0.50-1.52)  | 0.8262         |
| Tac+ MMF vs.CsA+MTX < 5 months  | 0.91 (0.67-1.22)  | 0.5196         |
| Tac+ MMF vs.CsA+ MMF < 5 months | 0.96 (0.55-1.65)  | 0.8682         |
| CsA+ MMF vs.CsA+MTX ≥ 5 months  | 0.76 (0.46-1.28)  | 0.3062         |
| Tac+ MMF vs.CsA+MTX ≥ 5 months  | 1.24 (0.95-1.62)  | 0.1127         |
| Tac+ MMF vs.CsA+ MMF ≥ 5 months | 1.62 (0.922-2.86) | 0.0931         |

**Supplementary Table: Overall Survival; Myeloablative, Sibling donor**

| <i>Parameter</i>                      | <i>N(%)</i>  | <i>Est (95% CI)</i> | <i>P-value</i>  | <i>Overall P-value</i> |
|---------------------------------------|--------------|---------------------|-----------------|------------------------|
| <b>GVHD prophylaxis &lt; 5 months</b> |              |                     |                 |                        |
| Tac+MTX                               |              | 1.00(., .)          | .               | <b>0.0001</b>          |
| CSA+MMF                               |              | 2.31 (1.73, 3.09)   | <b>&lt;.001</b> |                        |
| CSA+MTX                               |              | 1.27 (1.10, 1.48)   | <b>0.002</b>    |                        |
| Tac+MMF                               |              | 1.05 (0.81, 1.37)   | 0.704           |                        |
| <b>GVHD prophylaxis ≥ 5 months</b>    |              |                     |                 |                        |
| Tac+MTX                               |              | 1.00(., .)          | .               | <b>0.003</b>           |
| CSA+MMF                               |              | 0.94 (0.62, 1.43)   | 0.767           |                        |
| CSA+MTX                               |              | 0.74 (0.64, 0.87)   | <b>&lt;.001</b> |                        |
| Tac+MMF                               |              | 0.92 (0.70, 1.20)   | 0.530           |                        |
| <b>Age at transplant, years</b>       |              |                     |                 |                        |
| 18-29 (reference)                     | 924 (23.7%)  | 1.00 (., .)         |                 | <b>&lt;.001</b>        |
| 30-39                                 | 793 (20.3%)  | 1.23 (1.06, 1.43)   | <b>0.008</b>    |                        |
| 40-49                                 | 1040 (26.7%) | 1.46 (1.27, 1.68)   | <b>&lt;.001</b> |                        |
| 50-64                                 | 1087 (27.9%) | 1.84 (1.60, 2.12)   | <b>&lt;.001</b> |                        |
| 65+                                   | 53 (1.4%)    | 2.00 (1.41, 2.83)   | <b>&lt;.001</b> |                        |
| <b>Disease</b>                        |              |                     |                 |                        |
| AML (reference)                       | 1883 (48.3%) | 1.00 (., .)         |                 | <b>&lt;.001</b>        |
| ALL                                   | 796 (20.4%)  | 1.31 (1.16, 1.47)   | <b>&lt;.001</b> |                        |
| CML                                   | 829 (21.3%)  | 0.71 (0.61, 0.84)   | <b>&lt;.001</b> |                        |
| MDS                                   | 389 (10.0%)  | 1.04 (0.89, 1.21)   | 0.621           |                        |
| <b>Disease status</b>                 |              |                     |                 |                        |
| Early (reference)                     | 1852 (47.5%) | 1.00 (., .)         |                 | <b>&lt;.001</b>        |
| Advanced                              | 761 (19.5%)  | 2.01 (1.79, 2.24)   | <b>&lt;.001</b> |                        |
| Intermediate                          | 1242 (31.9%) | 1.23 (1.08, 1.41)   | <b>0.002</b>    |                        |
| Missing                               | 42 (1.1%)    | 1.52 (1.00, 2.30)   | 0.048           |                        |
| <b>Donor-recipient CMV match</b>      |              |                     |                 |                        |
| -/- (reference)                       | 833 (21.4%)  | 1.00 (., .)         |                 | <b>0.015</b>           |
| +/+                                   | 1887 (48.4%) | 1.07 (0.95, 1.20)   | 0.275           |                        |
| +/-                                   | 384 (9.9%)   | 0.86 (0.72, 1.02)   | 0.086           |                        |
| -/+                                   | 672 (17.2%)  | 1.01 (0.87, 1.16)   | 0.913           |                        |
| Missing                               | 121 (3.1%)   | 1.34 (1.04, 1.74)   | 0.026           |                        |
| <b>Donor-recipient sex match</b>      |              |                     |                 |                        |
| M-M (reference)                       | 1266 (32.5%) | 1.00 (., .)         |                 | <b>&lt;.001</b>        |
| F-F                                   | 803 (20.6%)  | 1.00 (0.88, 1.14)   | 0.997           |                        |
| F-M                                   | 945 (24.2%)  | 1.37 (1.22, 1.55)   | <b>&lt;.001</b> |                        |
| M-F                                   | 883 (22.7%)  | 0.97 (0.85, 1.09)   | 0.583           |                        |
| <b>Graft type</b>                     |              |                     |                 |                        |
| BM (reference)                        | 784 (20.1%)  | 1.00 (., .)         |                 | <b>&lt;.001</b>        |
| PB                                    | 3113 (79.9%) | 1.40 (1.23, 1.60)   | <b>&lt;.001</b> |                        |
| <b>Karnofsky performance score</b>    |              |                     |                 |                        |
| <90 (reference)                       | 1019 (26.1%) | 1.00 (., .)         |                 | <b>&lt;.001</b>        |

| <i>Parameter</i>                 | <i>N(%)</i>  | <i>Est (95% CI)</i> | <i>P-value</i>  | <i>Overall P-value</i> |
|----------------------------------|--------------|---------------------|-----------------|------------------------|
| 90-100                           | 2769 (71.1%) | 0.72 (0.65, 0.79)   | <b>&lt;.001</b> |                        |
| Missing                          | 109 (2.8%)   | 0.81 (0.63, 1.05)   | 0.113           |                        |
| <b>Sorrer co-morbidity index</b> |              |                     |                 |                        |
| 0-1 (reference)                  | 662 (17.0%)  | 1.00 (, )           |                 | <b>0.024</b>           |
| >=2                              | 576 (14.8%)  | 1.13 (0.97, 1.32)   | 0.114           |                        |
| Missing                          | 19 (0.5%)    | 1.28 (0.63, 2.60)   | 0.496           |                        |
| N/A Prior to 2007                | 2640 (67.7%) | 0.83 (0.68, 1.00)   | 0.051           |                        |
| <b>Year of transplant</b>        |              |                     |                 |                        |
| 2000-2004 (reference)            | 1745 (44.8%) | 1.00 (, )           |                 | <b>&lt;.001</b>        |
| 2005-2008                        | 1168 (30.0%) | 0.84 (0.74, 0.95)   | <b>0.006</b>    |                        |
| 2009-2013                        | 984 (25.3%)  | 0.61 (0.49, 0.75)   | <b>&lt;.001</b> |                        |

### Pairwise Comparisons

|                                 | <i>HR (95% CI)</i> | <i>P-value</i> |
|---------------------------------|--------------------|----------------|
| CsA+ MMF vs.CsA+MTX < 5 months  | 1.82 (1.36-2.42)   | <.0001         |
| Tac+ MMF vs.CsA+MTX < 5 months  | 0.93 (0.63-1.08)   | 0.1607         |
| Tac+ MMF vs.CsA+ MMF < 5 months | 0.46 (0.32-0.65)   | <.0001         |
| CsA+ MMF vs.CsA+MTX ≥ 5 months  | 1.26 (0.83-1.92)   | 0.2786         |
| Tac+ MMF vs.CsA+MTX ≥ 5 months  | 1.23 (0.94-1.63)   | 0.1358         |
| Tac+ MMF vs.CsA+ MMF ≥ 5 months | 0.98 (0.61-1.58)   | 0.9267         |

**Supplementary Table: Disease-Free Survival; Myeloablative, Sibling donor**

| <i>Parameter</i>                   | <i>N(%)</i>  | <i>Est (95% CI)</i> | <i>P-value</i>  | <i>Overall P-value</i> |
|------------------------------------|--------------|---------------------|-----------------|------------------------|
| <b>GVHD prophylaxis</b>            |              |                     |                 |                        |
| Tac + MTX (reference)              | 1368 (35.0%) | 1.00 (., .)         | .               | <b>&lt;.001</b>        |
| CsA + MMF                          | 112 (2.9%)   | 1.64 (1.30, 2.06)   | <b>&lt;.001</b> |                        |
| CsA + MTX                          | 2212 (56.5%) | 1.01 (0.90, 1.13)   | 0.912           |                        |
| Tac + MMF                          | 219 (5.6%)   | 0.94 (0.78, 1.13)   | 0.502           |                        |
| <b>Age at transplant, years</b>    |              |                     |                 |                        |
| 18-29 (reference)                  | 937 (24%)    | 1.00 (., .)         | .               | <b>&lt;.001</b>        |
| 30-39                              | 796 (20.4%)  | 1.10 (0.96, 1.27)   | 0.155           |                        |
| 40-49                              | 1038 (26.5%) | 1.28 (1.13, 1.45)   | <b>&lt;.001</b> |                        |
| 50-64                              | 1087 (27.8%) | 1.54 (1.35, 1.75)   | <b>&lt;.001</b> |                        |
| 65+                                | 53 (1.4%)    | 2.26 (1.62, 3.14)   | <b>&lt;.001</b> |                        |
| <b>Disease</b>                     |              |                     |                 |                        |
| AML (reference)                    | 1884 (48.2%) | 1.00 (., .)         | .               | <b>&lt;.001</b>        |
| ALL                                | 794 (20.3%)  | 1.29 (1.15, 1.45)   | <b>&lt;.001</b> |                        |
| CML                                | 841 (21.5%)  | 0.93 (0.81, 1.08)   | 0.341           |                        |
| MDS                                | 391 (10.0%)  | 0.89 (0.77, 1.03)   | 0.112           |                        |
| <b>Disease status</b>              |              |                     |                 |                        |
| Early (reference)                  | 1872 (47.9%) | 1.00 (., .)         | .               | <b>&lt;.001</b>        |
| Advanced                           | 744 (19.0%)  | 2.38 (2.14, 2.65)   | <b>&lt;.001</b> |                        |
| Intermediate                       | 1253 (32.0%) | 1.34 (1.18, 1.52)   | <b>&lt;.001</b> |                        |
| Missing                            | 42 (1.1%)    | 1.63 (1.11, 2.39)   | 0.012           |                        |
| <b>Donor-recipient CMV match</b>   |              |                     |                 |                        |
| -/- (reference)                    | 839 (21.5%)  | 1.00 (., .)         | .               | <b>0.011</b>           |
| +/+                                | 1899 (48.6%) | 1.10 (0.99, 1.23)   | 0.090           |                        |
| +/-                                | 381 (9.7%)   | 0.92 (0.78, 1.09)   | 0.352           |                        |
| -/+                                | 672 (17.2%)  | 0.99 (0.86, 1.13)   | 0.871           |                        |
| Missing                            | 120 (3.1%)   | 1.36 (1.07, 1.73)   | 0.011           |                        |
| <b>Karnofsky performance score</b> |              |                     |                 |                        |
| <90 (reference)                    | 1019 (26.1%) | 1.00 (., .)         | .               | <b>&lt;.001</b>        |
| 90-100                             | 2783 (71.2%) | 0.70 (0.63, 0.76)   | <b>&lt;.001</b> |                        |
| Missing                            | 108 (2.8%)   | 0.89 (0.69, 1.13)   | 0.330           |                        |
| <b>Race</b>                        |              |                     |                 |                        |
| Caucasian (reference)              | 3142 (80.3%) | 1.00 (., .)         | .               | <b>0.014</b>           |
| Missing                            | 197 (5.0%)   | 1.30 (1.08, 1.56)   | <b>0.006</b>    |                        |
| Non-Caucasian                      | 572 (14.6%)  | 1.08 (0.96, 1.23)   | 0.210           |                        |
| <b>Sorrow co-morbidity index</b>   |              |                     |                 |                        |
| 0-1 (reference)                    | 661 (16.9%)  | 1.00 (., .)         | .               | <b>&lt;.001</b>        |
| >=2                                | 571 (14.6%)  | 1.08 (0.94, 1.25)   | 0.289           |                        |
| Missing                            | 19 (0.5%)    | 1.85 (1.03, 3.32)   | 0.038           |                        |
| N/A Prior to 2007                  | 2660 (68.0%) | 0.77 (0.64, 0.93)   | <b>0.006</b>    |                        |
| <b>Year of transplant</b>          |              |                     |                 |                        |
| 2000-2004 (reference)              | 1743 (44.6%) | 1.00 (., .)         | .               | <b>0.033</b>           |

| <i>Parameter</i> | <i>N(%)</i>  | <i>Est (95% CI)</i> | <i>P-value</i> | <i>Overall P-value</i> |
|------------------|--------------|---------------------|----------------|------------------------|
| 2005-2008        | 1192 (30.5%) | 0.92 (0.81, 1.03)   | 0.138          |                        |
| 2009-2013        | 976 (25.0%)  | 0.76 (0.62, 0.93)   | <b>0.009</b>   |                        |

---

### **Pairwise Comparisons**

|                         | <i>HR (%95 CI)</i> | <i>P-value</i>  |
|-------------------------|--------------------|-----------------|
| <b>GVHD prophylaxis</b> |                    |                 |
| CsA + MMF vs Tac + MTX  | 1.64 (1.30 - 2.06) | <b>&lt;.001</b> |
| CsA + MMF vs CsA + MTX  | 1.63 (1.29 - 2.05) | <b>&lt;.001</b> |
| CsA + MMF vs Tac + MMF  | 1.74 (1.32 - 2.30) | <b>&lt;.001</b> |
| CsA + MTX vs Tac + MTX  | 1.01 (0.90 - 1.13) | 0.912           |
| CsA + MTX vs Tac + MMF  | 1.07 (0.88 - 1.30) | 0.489           |
| Tac + MMF vs Tac + MTX  | 0.94 (0.78 - 1.13) | 0.502           |

**Supplementary Table: Treatment-related Morality; Myeloablative, Sibling donor**

| <i>Parameter</i>                      | <i>N(%)</i>  | <i>Est (95% CI)</i> | <i>P-value</i>  | <i>Overall P-value</i> |
|---------------------------------------|--------------|---------------------|-----------------|------------------------|
| <b>GVHD prophylaxis &lt; 5 months</b> |              |                     |                 |                        |
| Tac+MTX                               |              | 1.00(., .)          | .               | <b>0.0001</b>          |
| CSA+MMF                               |              | 4.03 (2.61, 6.23)   | <b>&lt;.001</b> |                        |
| CSA+MTX                               |              | 2.29 (1.78, 2.95)   | <b>&lt;.001</b> |                        |
| Tac+MMF                               |              | 1.17 (0.71, 1.94)   | 0.537           |                        |
| <b>GVHD prophylaxis ≥ 5 months</b>    |              |                     |                 |                        |
| Tac+MTX                               |              | 1.00(., .)          | .               | 0.174                  |
| CSA+MMF                               |              | 1.38 (0.78, 2.44)   | 0.275           |                        |
| CSA+MTX                               |              | 0.83 (0.67, 1.03)   | 0.095           |                        |
| Tac+MMF                               |              | 0.90 (0.59, 1.36)   | 0.609           |                        |
| <b>Graft type</b>                     |              |                     |                 |                        |
| <b>Age at transplant, years</b>       |              |                     |                 |                        |
| 18-29 (reference)                     | 936 (23.9%)  | 1.00 (., .)         | .               | <b>&lt;.001</b>        |
| 30-39                                 | 796 (20.4%)  | 1.33 (1.05, 1.68)   | 0.018           |                        |
| 40-49                                 | 1038 (26.5%) | 1.70 (1.37, 2.12)   | <b>&lt;.001</b> |                        |
| 50-64                                 | 1087 (27.8%) | 2.63 (2.11, 3.27)   | <b>&lt;.001</b> |                        |
| 65+                                   | 53 (1.4%)    | 3.52 (2.15, 5.76)   | <b>&lt;.001</b> |                        |
| <b>Disease</b>                        |              |                     |                 |                        |
| AML (reference)                       | 1884 (48.2%) | 1.00 (., .)         | .               | <b>&lt;.001</b>        |
| ALL                                   | 794 (20.3%)  | 1.65 (1.37, 1.98)   | <b>&lt;.001</b> |                        |
| CML                                   | 841 (21.5%)  | 0.96 (0.77, 1.21)   | 0.751           |                        |
| MDS                                   | 391 (10.0%)  | 1.44 (1.16, 1.79)   | <b>0.001</b>    |                        |
| <b>Disease status</b>                 |              |                     |                 |                        |
| Early (reference)                     | 1871 (47.9%) | 1.00 (., .)         | .               | <b>&lt;.001</b>        |
| Advanced                              | 744 (19.0%)  | 1.48 (1.23, 1.79)   | <b>&lt;.001</b> |                        |
| Intermediate                          | 1253 (32.0%) | 1.41 (1.16, 1.71)   | <b>&lt;.001</b> |                        |
| Missing                               | 42 (1.1%)    | 1.49 (0.83, 2.67)   | 0.185           |                        |
| <b>Donor-recipient CMV match</b>      |              |                     |                 |                        |
| -/- (reference)                       | 839 (21.5%)  | 1.00 (., .)         | .               | <b>0.012</b>           |
| +/+                                   | 1898 (48.5%) | 1.12 (0.93, 1.33)   | 0.226           |                        |
| +/-                                   | 381 (9.7%)   | 0.77 (0.59, 1.02)   | 0.070           |                        |
| -/+                                   | 672 (17.2%)  | 0.97 (0.78, 1.21)   | 0.790           |                        |
| Missing                               | 120 (3.1%)   | 1.46 (1.02, 2.09)   | 0.038           |                        |
| <b>Donor-recipient sex match</b>      |              |                     |                 |                        |
| M-M (reference)                       | 1279 (32.7%) | 1.00 (., .)         | .               | <b>&lt;.001</b>        |
| F-F                                   | 802 (20.5%)  | 1.06 (0.88, 1.30)   | 0.529           |                        |
| F-M                                   | 937 (24.0%)  | 1.44 (1.21, 1.72)   | <b>&lt;.001</b> |                        |
| M-F                                   | 892 (22.8%)  | 1.06 (0.87, 1.28)   | 0.574           |                        |
| <b>Graft type</b>                     |              |                     |                 |                        |
| BM (reference)                        | 788 (20.2%)  | 1.00 (., .)         | .               | <b>&lt;.001</b>        |
| PB                                    | 3122 (79.8%) | 1.53 (1.26, 1.86)   | <b>&lt;.001</b> |                        |
| <b>Karnofsky performance score</b>    |              |                     |                 |                        |
| <90 (reference)                       | 1019 (26.1%) | 1.00 (., .)         | .               | <b>&lt;.001</b>        |



| <i>Parameter</i>          | <i>N(%)</i>  | <i>Est (95% CI)</i> | <i>P-value</i>  | <i>Overall P-value</i> |
|---------------------------|--------------|---------------------|-----------------|------------------------|
| 90-100                    | 2783 (71.2%) | 0.67 (0.58, 0.78)   | <b>&lt;.001</b> |                        |
| Missing                   | 108 (2.8%)   | 1.01 (0.70, 1.44)   | 0.974           |                        |
| <b>Race</b>               |              |                     |                 |                        |
| Caucasian (reference)     | 3141 (80.3%) | 1.00 (., .)         | .               | <b>0.001</b>           |
| Missing                   | 197 (5.0%)   | 1.40 (1.04, 1.87)   | 0.025           |                        |
| Non-Caucasian             | 572 (14.6%)  | 1.35 (1.12, 1.63)   | <b>0.002</b>    |                        |
| <b>Year of transplant</b> |              |                     |                 |                        |
| 2000-2004 (reference)     | 1743 (44.6%) | 1.00 (., .)         | .               | <b>0.025</b>           |
| 2005-2008                 | 1191 (30.5%) | 0.80 (0.68, 0.96)   | 0.014           |                        |
| 2009-2013                 | 976 (25.0%)  | 0.79 (0.64, 0.98)   | 0.030           |                        |

### Pairwise Comparisons

|                                 | <i>HR (95% CI)</i> | <i>P-value</i> |
|---------------------------------|--------------------|----------------|
| CsA+ MMF vs.CsA+MTX < 5 months  | 1.76 (1.17-2.65)   | 0.0070         |
| Tac+ MMF vs.CsA+MTX < 5 months  | 0.51 (0.31-0.84)   | 0.0074         |
| Tac+ MMF vs.CsA+ MMF < 5 months | 0.29 (0.159-0.53)  | <.0001         |
| CsA+ MMF vs.CsA+MTX ≥ 5 months  | 1.66 (0.94-2.93)   | 0.0821         |
| Tac+ MMF vs.CsA+MTX ≥ 5 months  | 1.08 (0.71-1.66)   | 0.7118         |
| Tac+ MMF vs.CsA+ MMF ≥ 5 months | 0.65 (0.33-1.29)   | 0.2179         |

**Supplementary Table: Relapse; Myeloablative, Sibling donor**

| <i>Parameter</i>                   | <i>N(%)</i>  | <i>Est (95% CI)</i> | <i>P-value</i>  | <i>Overall P-value</i> |
|------------------------------------|--------------|---------------------|-----------------|------------------------|
| <b>GVHD prophylaxis</b>            |              |                     |                 |                        |
| Tac + MTX (reference)              | 1368 (35.0%) | 1.00 (., .)         | .               | <b>0.005</b>           |
| CsA + MMF                          | 112 (2.9%)   | 1.43 (1.05, 1.93)   | 0.022           |                        |
| CsA + MTX                          | 2212 (56.6%) | 0.86 (0.74, 0.98)   | 0.029           |                        |
| Tac + MMF                          | 219 (5.6%)   | 0.92 (0.73, 1.14)   | 0.444           |                        |
| <b>Disease</b>                     |              |                     |                 |                        |
| AML (reference)                    | 1884 (48.2%) | 1.00 (., .)         | .               | <b>&lt;.001</b>        |
| ALL                                | 794 (20.3%)  | 1.10 (0.95, 1.27)   | 0.213           |                        |
| CML                                | 841 (21.5%)  | 0.97 (0.80, 1.17)   | 0.741           |                        |
| MDS                                | 391 (10.0%)  | 0.68 (0.56, 0.82)   | <b>&lt;.001</b> |                        |
| <b>Disease status</b>              |              |                     |                 |                        |
| Early (reference)                  | 1872 (47.9%) | 1.00 (., .)         | .               | <b>&lt;.001</b>        |
| Advanced                           | 744 (19.0%)  | 3.05 (2.66, 3.49)   | <b>&lt;.001</b> |                        |
| Intermediate                       | 1253 (32.0%) | 1.28 (1.09, 1.51)   | <b>0.003</b>    |                        |
| Missing                            | 42 (1.1%)    | 1.75 (1.06, 2.91)   | 0.029           |                        |
| <b>Karnofsky performance score</b> |              |                     |                 |                        |
| <90 (reference)                    | 1019 (26.1%) | 1.00 (., .)         | .               | <b>&lt;.001</b>        |
| 90-100                             | 2783 (71.2%) | 0.71 (0.63, 0.81)   | <b>&lt;.001</b> |                        |
| Missing                            | 108 (2.8%)   | 0.82 (0.59, 1.14)   | 0.239           |                        |
| <b>Sorrow co-morbidity index</b>   |              |                     |                 |                        |
| 0-1 (reference)                    | 661 (16.9%)  | 1.00 (., .)         | .               | <b>&lt;.001</b>        |
| >=2                                | 571 (14.6%)  | 1.06 (0.89, 1.27)   | 0.524           |                        |
| Missing                            | 19 (0.5%)    | 2.73 (1.44, 5.18)   | <b>0.002</b>    |                        |
| N/A Prior to 2007                  | 2660 (68.0%) | 0.69 (0.55, 0.86)   | <b>&lt;.001</b> |                        |
| <b>Year of transplant</b>          |              |                     |                 |                        |
| 2000-2004 (reference)              | 1743 (44.6%) | 1.00 (., .)         | .               | <b>0.043</b>           |
| 2005-2008                          | 1192 (30.5%) | 0.99 (0.85, 1.15)   | 0.876           |                        |
| 2009-2013                          | 976 (25.0%)  | 0.77 (0.60, 0.98)   | 0.037           |                        |

**Pairwise comparisons**

|                         | <i>HR (95% CI)</i> | <i>P-value</i> |
|-------------------------|--------------------|----------------|
| <b>GVHD prophylaxis</b> |                    |                |
| CsA + MMF vs Tac + MTX  | 1.43 (1.05 - 1.93) | 0.022          |
| CsA + MMF vs CsA + MTX  | 1.67 (1.23 - 2.27) | <b>0.001</b>   |
| CsA + MMF vs Tac + MMF  | 1.56 (1.09 - 2.23) | 0.016          |
| CsA + MTX vs Tac + MTX  | 0.86 (0.74 - 0.98) | 0.029          |
| CsA + MTX vs Tac + MMF  | 0.93 (0.74 - 1.18) | 0.570          |
| Tac + MMF vs Tac + MTX  | 0.92 (0.73 - 1.14) | 0.444          |

**Supplementary Table: Acute GVHD 2-4; Myeloablative, Unrelated donor**

| <i>Parameter</i>                   | <i>N(%)</i>  | <i>Est (95% CI)</i> | <i>P-value</i>    | <i>Overall P-value</i> |
|------------------------------------|--------------|---------------------|-------------------|------------------------|
| <b>GVHD prophylaxis</b>            |              |                     |                   | 0.030                  |
| Tac + MTX (reference)              | 2678 (64.9%) | 1.00 (., .)         |                   |                        |
| CsA + MMF                          | 68 (1.6%)    | 1.49 (1.08, 2.07)   | 0.016             |                        |
| CsA + MTX                          | 964 (23.3%)  | 1.00 (0.90, 1.12)   | 0.961             |                        |
| Tac + MMF                          | 419 (10.1%)  | 1.14 (0.99, 1.32)   | 0.066             |                        |
| <b>Conditioning regimen / ATG</b>  |              |                     |                   |                        |
| BU+CU+/-others (reference)         | 1051 (25.5%) | 1.00 (ref)          |                   | <b>&lt; 0.001</b>      |
| ATG+BU+/-CY+/-FLU+/-others         | 699 (16.9%)  | 0.76 (0.66-0.87)    | <b>&lt; 0.001</b> |                        |
| ATG+TBI+/-CY+/-others              | 309 (7.5%)   | 0.64 (0.52, 0.79)   | <b>&lt; 0.001</b> |                        |
| BU+FLU+/-others                    | 397 (9.6%)   | 1.10 (0.94, 1.29)   | 0.224             |                        |
| TBI+/-CY+/-others                  | 1505 (36.4%) | 1.06 (0.94, 1.18)   | 0.351             |                        |
| TBI+ETOP+/-others                  | 81 (2%)      | 0.97 (0.70, 1.35)   | 0.854             |                        |
| others                             | 87 (2.1%)    | 1.00 (0.74, 1.36)   | 0.979             |                        |
| <b>Disease</b>                     |              |                     |                   | <b>&lt;.001</b>        |
| AML (reference)                    | 2237 (54.2%) | 1.00 (., .)         |                   |                        |
| ALL                                | 81 (18.9%)   | 1.08 (0.95, 1.23)   | 0.215             |                        |
| CML                                | 546 (13.2%)  | 1.26 (1.10, 1.43)   | <b>&lt;.001</b>   |                        |
| MDS                                | 565 (13.7%)  | 1.21 (1.07, 1.38)   | <b>0.003</b>      |                        |
| <b>Donor type</b>                  |              |                     |                   | <b>&lt;.001</b>        |
| 8/8-matched (reference)            | 974 (23.6%)  | 1.00 (., .)         |                   |                        |
| 7/8-matched                        | 3155 (76.4%) | 0.74 (0.67, 0.82)   | <b>&lt;.001</b>   |                        |
| <b>Graft type</b>                  |              |                     |                   | <b>&lt;.001</b>        |
| BM (reference)                     | 1348 (32.6%) | 1.00 (., .)         |                   |                        |
| PB                                 | 2781 (67.4%) | 1.30 (1.18, 1.44)   | <b>&lt;.001</b>   |                        |
| <b>Sex</b>                         |              |                     |                   |                        |
| Male (reference)                   | 2253 (54.6%) | 1.00 (., .)         |                   |                        |
| Female                             | 1876 (45.4%) | 0.91 (0.83, 0.99)   | 0.029             | 0.029                  |
| <b>Sorrer's Co-morbidity index</b> |              |                     |                   | <b>0.012</b>           |
| 0-1 (reference)                    | 867 (21.0%)  | 1.00 (., .)         |                   |                        |
| ≥ 2                                | 822 (19.9%)  | 1.16 (1.01, 1.33)   | 0.030             |                        |
| Missing                            | 42 (1.0%)    | 1.37 (0.87, 2.15)   | 0.179             |                        |
| N/A prior to 2007                  | 2398 (58.1%) | 1.21 (1.08, 1.37)   | <b>0.002</b>      |                        |
| <b>Unrelated donor age, years</b>  |              |                     |                   | <b>0.009</b>           |
| 18-32 (reference)                  | 2001 (48.5%) | 1.00 (., .)         |                   |                        |
| 33-49                              | 1760 (42.6%) | 1.07 (0.98, 1.18)   | 0.127             |                        |
| 50+                                | 260 (6.3%)   | 1.34 (1.13, 1.59)   | <b>&lt;.001</b>   |                        |
| Missing                            | 108 (2.6%)   | 1.10 (0.84, 1.46)   | 0.484             |                        |

| <b>Pairwise Comparisons</b> | <b>HR (95% CI)</b> | <b>P-value</b> |
|-----------------------------|--------------------|----------------|
| CsA + MMF vs Tac + MTX      | 1.49 (1.08 - 2.07) | 0.016          |
| CsA + MMF vs CSA + MTX      | 1.49 (1.07 - 2.08) | 0.019          |
| CsA + MMFvs Tac + MMF       | 1.31 (0.92 - 1.85) | 0.133          |
| CsA + MTX vs Tac + MTX      | 1.00 (0.90 - 1.12) | 0.961          |
| CSA + MTX vs TAC + MMF      | 0.88 (0.74 - 1.04) | 0.126          |
| TAC + MMF vs TAC + MTX      | 1.14 (0.99 - 1.32) | 0.066          |

**Supplementary Table: Acute GVHD 3-4; Myeloablative, Unrelated donor**

| <i>Parameter</i>                  | <i>N(%)</i>  | <i>Est (%95 CI)</i> | <i>P-value</i>  | <i>Overall P-value</i> |
|-----------------------------------|--------------|---------------------|-----------------|------------------------|
| <b>GVHD prophylaxis</b>           |              |                     |                 |                        |
| Tac + MTX (reference)             | 2673 (64.8%) | 1.00 (., .)         | .               | <b>&lt;.001</b>        |
| CsA + MMF                         | 68 (1.6%)    | 2.31 (1.57, 3.42)   | <b>&lt;.001</b> |                        |
| CsA + MTX                         | 965 (23.4%)  | 1.02 (0.87, 1.20)   | 0.806           |                        |
| Tac + MMF                         | 420 (10.2%)  | 1.26 (1.02, 1.56)   | 0.030           |                        |
| <b>Conditioning regimen / ATG</b> |              |                     |                 |                        |
| (MA)BU+CU+/-others (reference)    | 1053 (25.5%) | 1.00 (., .)         | .               | <b>&lt;.001</b>        |
| (MA)ATG+BU+/-CY+/-FLU+/-others    | 698 (16.9%)  | 0.59 (0.47, 0.74)   | <b>&lt;.001</b> |                        |
| (MA)ATG+TBI+/-CY+/-others         | 308 (7.5%)   | 0.58 (0.42, 0.80)   | <b>&lt;.001</b> |                        |
| (MA)BU+FLU+/-others               | 396 (9.6%)   | 0.90 (0.70, 1.16)   | 0.410           |                        |
| (MA)TBI+/-CY+/-others             | 1503 (36.4%) | 1.09 (0.92, 1.30)   | 0.303           |                        |
| (MA)TBI+ETOP+/-others             | 81 (2.0%)    | 0.95 (0.59, 1.54)   | 0.838           |                        |
| (MA)others                        | 87 (2.1%)    | 1.22 (0.79, 1.87)   | 0.364           |                        |
| <b>Disease</b>                    |              |                     |                 |                        |
| AML (reference)                   | 2235 (54.2%) | 1.00 (., .)         | .               | <b>&lt;.001</b>        |
| ALL                               | 780 (18.9%)  | 1.17 (0.96, 1.42)   | 0.112           |                        |
| CML                               | 546 (13.2%)  | 1.56 (1.29, 1.88)   | <b>&lt;.001</b> |                        |
| MDS                               | 565 (13.7%)  | 1.21 (0.98, 1.48)   | 0.079           |                        |
| <b>Disease status</b>             |              |                     |                 |                        |
| Early (reference)                 | 2009 (48.7%) | 1.00 (., .)         | .               | <b>0.020</b>           |
| Advanced                          | 1051 (25.5%) | 1.14 (0.97, 1.34)   | 0.101           |                        |
| Intermediate                      | 1015 (24.6%) | 0.88 (0.74, 1.04)   | 0.123           |                        |
| Missing                           | 51 (1.2%)    | 1.53 (0.92, 2.55)   | 0.104           |                        |
| <b>Donor type</b>                 |              |                     |                 |                        |
| 8/8-matched (reference)           | 3152 (76.4%) | 1.00 (., .)         | .               | <b>&lt;.001</b>        |
| 7/8-matched                       | 974 (23.6%)  | 1.75 (1.52, 2.02)   | <b>&lt;.001</b> |                        |
| <b>Graft type</b>                 |              |                     |                 |                        |
| BM (reference)                    | 1348 (32.7%) | 1.00 (., .)         | .               | <b>0.002</b>           |
| PB                                | 2778 (67.3%) | 1.27 (1.09, 1.47)   | <b>0.002</b>    |                        |
| <b>Sex</b>                        |              |                     |                 |                        |
| Male (reference)                  | 2252 (54.6%) | 1.00 (., .)         | .               |                        |
| Female                            | 1874 (45.4%) | 0.80 (0.70, 0.92)   | <b>0.001</b>    |                        |
| <b>Unrelated donor age, years</b> |              |                     |                 |                        |
| 18-32 (reference)                 | 1998 (48.4%) | 1.00 (., .)         | .               | <b>&lt;.001</b>        |
| 33-49                             | 1759 (42.6%) | 1.29 (1.12, 1.49)   | <b>&lt;.001</b> |                        |
| 50+                               | 261 (6.3%)   | 1.36 (1.05, 1.77)   | 0.020           |                        |
| Missing                           | 108 (2.6%)   | 1.62 (1.12, 2.33)   | <b>0.009</b>    |                        |

**Pairwise Comparisons**

|                         | <i>HR (95% CI)</i> | <i>P-value</i>  |
|-------------------------|--------------------|-----------------|
| <b>GVHD prophylaxis</b> |                    |                 |
| CsA + MMF vs Tac + MTX  | 2.31 (1.57 - 3.42) | <b>&lt;.001</b> |

---

**Pairwise Comparisons**

|                        | <i>HR (95% CI)</i> | <i>P-value</i>  |
|------------------------|--------------------|-----------------|
| CsA + MMF vs CsA + MTX | 2.27 (1.51 - 3.40) | <b>&lt;.001</b> |
| CsA + MMF vs Tac + MMF | 1.83 (1.19 - 2.81) | <b>0.006</b>    |
| CsA + MTX vs Tac + MTX | 1.02 (0.87 - 1.20) | 0.806           |
| CsA + MTX vs Tac + MMF | 0.81 (0.63 - 1.03) | 0.087           |
| Tac + MMF vs Tac + MTX | 1.26 (1.02 - 1.56) | 0.030           |

---

**Supplementary Table: Chronic GVHD; Myeloablative, Unrelated donor**

| <i>Parameter</i>                      | <i>N(%)</i>  | <i>Est (%95 CI)</i> | <i>P-value</i>  | <i>Overall P-value</i> |
|---------------------------------------|--------------|---------------------|-----------------|------------------------|
| <b>GVHD prophylaxis &lt; 4 months</b> |              |                     |                 |                        |
| Tac+MTX                               |              | 1.00(., .)          | .               | <b>0.0001</b>          |
| CSA+MMF                               |              | 1.54 (0.79, 2.98)   | 0.203           |                        |
| CSA+MTX                               |              | 1.62 (1.35, 1.93)   | <b>&lt;.001</b> |                        |
| Tac+MMF                               |              | 1.34 (1.04, 1.73)   | 0.022           |                        |
| <b>GVHD prophylaxis ≥ 4 months</b>    |              |                     |                 |                        |
| Tac+MTX                               |              | 1.00(., .)          | .               | <b>0.0001</b>          |
| CSA+MMF                               |              | 0.92 (0.52, 1.63)   | 0.779           |                        |
| CSA+MTX                               |              | 0.85 (0.74, 0.98)   | 0.025           |                        |
| Tac+MMF                               |              | 1.47 (1.24, 1.75)   | <b>&lt;.001</b> |                        |
| <b>Conditioning regimen / ATG</b>     |              |                     |                 |                        |
| (MA)BU+CU+/-others<br>(reference)     | 1050 (25.5%) | 1.00 (, )           |                 | <b>&lt;.001</b>        |
| (MA)ATG+BU+/-CY+/-<br>FLU+/-others    | 695 (16.9%)  | 0.51 (0.44, 0.59)   | <b>&lt;.001</b> |                        |
| (MA)ATG+TBI+/-CY+/-others             | 306 (7.4%)   | 0.47 (0.38, 0.58)   | <b>&lt;.001</b> |                        |
| (MA)BU+FLU+/-others                   | 394 (9.6%)   | 1.25 (1.07, 1.45)   | <b>0.005</b>    |                        |
| (MA)TBI+/-CY+/-others                 | 1506 (36.6%) | 0.83 (0.74, 0.93)   | <b>&lt;.001</b> |                        |
| (MA)TBI+ETOP+/-others                 | 79 (1.9%)    | 0.94 (0.68, 1.32)   | 0.732           |                        |
| (MA)others                            | 87 (2.1%)    | 0.66 (0.46, 0.93)   | 0.018           |                        |
| <b>Disease</b>                        |              |                     |                 |                        |
| AML (reference)                       | 2228 (54.1%) | 1.00 (, )           |                 | <b>&lt;.001</b>        |
| ALL                                   | 782 (19.0%)  | 0.85 (0.75, 0.98)   | 0.020           |                        |
| CML                                   | 538 (13.1%)  | 1.19 (1.04, 1.35)   | <b>0.009</b>    |                        |
| MDS                                   | 569 (13.8%)  | 1.13 (0.99, 1.28)   | 0.063           |                        |
| <b>Donor-recipient sex match</b>      |              |                     |                 |                        |
| M-M (reference)                       | 1561 (37.9%) | 1.00 (, )           |                 | <b>&lt;.001</b>        |
| F-F                                   | 690 (16.8%)  | 0.95 (0.84, 1.08)   | 0.435           |                        |
| F-M                                   | 685 (16.6%)  | 1.11 (0.98, 1.26)   | 0.093           |                        |
| M-F                                   | 1181 (28.7%) | 0.85 (0.76, 0.95)   | <b>0.003</b>    |                        |
| <b>Unrelated donor age, years</b>     |              |                     |                 |                        |
| 18-32 (reference)                     | 2003 (48.7%) | 1.00 (, )           |                 | <b>0.014</b>           |
| 33-49                                 | 1747 (42.4%) | 1.03 (0.94, 1.13)   | 0.564           |                        |
| 50+                                   | 261 (6.3%)   | 1.28 (1.06, 1.53)   | <b>0.009</b>    |                        |
| Missing                               | 106 (2.6%)   | 0.76 (0.56, 1.03)   | 0.078           |                        |
| <b>Year of transplant</b>             |              |                     |                 |                        |
| 2000-2004 (reference)                 | 1117 (27.1%) | 1.00 (, )           |                 | <b>&lt;.001</b>        |
| 2005-2008                             | 1696 (41.2%) | 1.00 (0.89, 1.12)   | 0.993           |                        |
| 2009-2013                             | 1304 (31.7%) | 0.76 (0.67, 0.87)   | <b>&lt;.001</b> |                        |

---

**Pairwise Comparisons**

|                                      | <i>HR (95% CI)</i> | <i>P-value</i> |
|--------------------------------------|--------------------|----------------|
| CsA+ MMF vs.CsA+MTX < 4 months       | 0.95 (0.49-1.86)   | 0.8854         |
| Tac+ MMF vs.CsA+MTX < 4 months       | 0.83 (0.63-1.09)   | 0.1858         |
| Tac+ MMF vs.CsA+ MMF < 4 months      | 0.87 (0.44-1.75)   | 0.7010         |
| CsA+ MMF vs.CsA+MTX $\geq$ 4 months  | 1.08 (0.60-1.93)   | 0.7968         |
| Tac+ MMF vs.CsA+MTX $\geq$ 4 months  | 1.73 (1.41-2.12)   | <.0001         |
| Tac+ MMF vs.CsA+ MMF $\geq$ 4 months | 1.60 (0.89-2.89)   | 0.1186         |

---



**Supplementary Table: Overall Survival; Myeloablative, Unrelated donors**

| <i>Parameter</i>                      | <i>N(%)</i>  | <i>Est (95% CI)</i> | <i>P-value</i>  | <i>Overall P-value</i> |
|---------------------------------------|--------------|---------------------|-----------------|------------------------|
| <b>GVHD prophylaxis &lt; 4 months</b> |              |                     |                 |                        |
| Tac+MTX                               |              | 1.00(., .)          | .               | <b>0.0001</b>          |
| CSA+MMF                               |              | 2.36 (1.67, 3.35)   | <b>&lt;.001</b> |                        |
| CSA+MTX                               |              | 1.23 (1.08, 1.41)   | <b>0.002</b>    |                        |
| Tac+MMF                               |              | 1.20 (1.01, 1.44)   | 0.044           |                        |
| <b>GVHD prophylaxis ≥ 4 months</b>    |              |                     |                 |                        |
| Tac+MTX                               |              | 1.00(., .)          | .               | <b>0.004</b>           |
| CSA+MMF                               |              | 1.10 (0.64, 1.89)   | 0.730           |                        |
| CSA+MTX                               |              | 0.91 (0.79, 1.05)   | 0.221           |                        |
| Tac+MMF                               |              | 1.34 (1.12, 1.61)   | <b>0.001</b>    |                        |
| <b>Age at transplant, years</b>       |              |                     |                 |                        |
| 18-29 (reference)                     | 896 (21.8%)  | 1.00 (., .)         |                 | <b>&lt;.001</b>        |
| 30-39                                 | 803 (19.5%)  | 1.00 (0.88, 1.14)   | 0.952           |                        |
| 40-49                                 | 1043 (25.3%) | 1.19 (1.06, 1.34)   | <b>0.003</b>    |                        |
| 50-64                                 | 1248 (30.3%) | 1.37 (1.22, 1.54)   | <b>&lt;.001</b> |                        |
| 65+                                   | 127 (3.1%)   | 1.50 (1.18, 1.90)   | <b>&lt;.001</b> |                        |
| <b>Conditioning regimen / ATG</b>     |              |                     |                 |                        |
| (MA)BU+CY+/-others (reference)        | 1050 (25.5%) | 1.00 (., .)         |                 | <b>&lt;.001</b>        |
| (MA)ATG+BU+/-CY+/-FLU+/-others        | 695 (16.9%)  | 0.80 (0.70, 0.91)   | <b>&lt;.001</b> |                        |
| (MA)ATG+TBI+/-CY+/-others             | 306 (7.4%)   | 0.87 (0.73, 1.03)   | 0.099           |                        |
| (MA)BU+FLU+/-others                   | 394 (9.6%)   | 1.12 (0.96, 1.31)   | 0.150           |                        |
| (MA)TBI+/-CY+/-others                 | 1506 (36.6%) | 1.06 (0.95, 1.17)   | 0.279           |                        |
| (MA)TBI+ETOP+/-others                 | 79 (1.9%)    | 1.07 (0.81, 1.43)   | 0.631           |                        |
| (MA)others                            | 87 (2.1%)    | 1.08 (0.84, 1.40)   | 0.540           |                        |
| <b>Disease status</b>                 |              |                     |                 |                        |
| Early (reference)                     | 2005 (48.7%) | 1.00 (., .)         |                 | <b>&lt;.001</b>        |
| Advanced                              | 1056 (25.6%) | 1.71 (1.56, 1.87)   | <b>&lt;.001</b> |                        |
| Intermediate                          | 1005 (24.4%) | 1.08 (0.98, 1.20)   | 0.126           |                        |
| Missing                               | 51 (1.2%)    | 1.14 (0.80, 1.61)   | 0.471           |                        |
| <b>Donor type</b>                     |              |                     |                 |                        |
| 8/8-matched (reference)               | 3147 (76.4%) | 1.00 (., .)         |                 | <b>&lt;.001</b>        |
| 7/8-matched                           | 970 (23.6%)  | 1.36 (1.24, 1.49)   | <b>&lt;.001</b> |                        |
| <b>Donor-recipient CMV match</b>      |              |                     |                 |                        |
| -/ (reference)                        | 1234 (30.0%) | 1.00 (., .)         |                 | <b>0.024</b>           |
| +/+                                   | 845 (20.5%)  | 1.14 (1.02, 1.28)   | 0.023           |                        |
| +/-                                   | 414 (10.1%)  | 1.16 (1.00, 1.33)   | 0.044           |                        |
| -/+                                   | 1432 (34.8%) | 1.17 (1.06, 1.29)   | <b>0.002</b>    |                        |
| Missing                               | 192 (4.7%)   | 1.11 (0.92, 1.34)   | 0.282           |                        |
| <b>Karnofsky performance score</b>    |              |                     |                 |                        |
| <90 (reference)                       | 1248 (30.3%) | 1.00 (., .)         |                 | <b>&lt;.001</b>        |
| 90-100                                | 2593 (63.0%) | 0.79 (0.73, 0.86)   | <b>&lt;.001</b> |                        |

| <i>Parameter</i>                  | <i>N(%)</i>  | <i>Est (95% CI)</i> | <i>P-value</i>  | <i>Overall P-value</i> |
|-----------------------------------|--------------|---------------------|-----------------|------------------------|
| Missing                           | 276 (6.7%)   | 0.83 (0.71, 0.98)   | 0.032           |                        |
| <b>Sex</b>                        |              |                     |                 |                        |
| Male (reference)                  | 2246 (54.6%) | 1.00 (, )           |                 | <b>&lt;.001</b>        |
| Female                            | 1871 (45.4%) | 0.86 (0.80, 0.93)   | <b>&lt;.001</b> |                        |
| <b>Sorrow co-morbidity index</b>  |              |                     |                 |                        |
| 0-1 (reference)                   | 869 (21.1%)  | 1.00 (, )           |                 | <b>0.004</b>           |
| >=2                               | 818 (19.9%)  | 1.11 (0.97, 1.26)   | 0.121           |                        |
| Missing                           | 41 (1.0%)    | 0.67 (0.41, 1.09)   | 0.106           |                        |
| N/A Prior to 2007                 | 2389 (58.0%) | 1.27 (1.08, 1.48)   | <b>0.003</b>    |                        |
| <b>Unrelated donor age, years</b> |              |                     |                 |                        |
| 18-32 (reference)                 | 2003 (48.7%) | 1.00 (, )           |                 | <b>&lt;.001</b>        |
| 33-49                             | 1747 (42.4%) | 1.17 (1.07, 1.27)   | <b>&lt;.001</b> |                        |
| 50+                               | 261 (6.3%)   | 1.42 (1.22, 1.66)   | <b>&lt;.001</b> |                        |
| Missing                           | 106 (2.6%)   | 0.93 (0.70, 1.23)   | 0.604           |                        |
| <b>Year of transplant</b>         |              |                     |                 |                        |
| 2000-2004 (reference)             | 1117 (27.1%) | 1.00 (, )           |                 | <b>0.013</b>           |
| 2005-2008                         | 1696 (41.2%) | 0.97 (0.87, 1.08)   | 0.573           |                        |
| 2009-2013                         | 1304 (31.7%) | 0.78 (0.65, 0.93)   | <b>0.007</b>    |                        |

#### Pairwise Comparisons

|                                 | <i>HR (95%CI)</i> | <i>P-value</i> |
|---------------------------------|-------------------|----------------|
| CsA+ MMF vs.CsA+MTX < 4 months  | 1.92 (1.34-2.75)  | 0.0004         |
| Tac+ MMF vs.CsA+MTX < 4 months  | 0.98 (0.80-1.20)  | 0.8210         |
| Tac+ MMF vs.CsA+ MMF < 4 months | 0.51 (0.35-0.74)  | 0.0005         |
| CsA+ MMF vs.CsA+MTX ≥ 4 months  | 1.20 (0.69-2.08)  | 0.5122         |
| Tac+ MMF vs.CsA+MTX ≥ 4 months  | 1.47 (1.18-1.81)  | 0.0004         |
| Tac+ MMF vs.CsA+ MMF ≥ 4 months | 1.22 (0.70-2.14)  | 0.4881         |

**Supplementary Table: Disease free survival *Myeloablative, Unrelated donors***

| <i>Parameter</i>                  | <i>N(%)</i>  | <i>Est (95% CI)</i> | <i>P-value</i>  | <i>Overall P-value</i> |
|-----------------------------------|--------------|---------------------|-----------------|------------------------|
| <b>GVHD prophylaxis</b>           |              |                     |                 |                        |
| Tac + MTX (reference)             | 2652 (64.9%) | 1.00 (., .)         | .               | 0.100                  |
| CsA + MMF                         | 64 (1.6%)    | 1.41 (1.04, 1.91)   | 0.028           |                        |
| CsA + MTX                         | 954 (23.4%)  | 1.04 (0.95, 1.15)   | 0.389           |                        |
| Tac + MMF                         | 415 (10.2%)  | 1.08 (0.95, 1.22)   | 0.252           |                        |
| <b>Age at transplant, years</b>   |              |                     |                 |                        |
| 18-29 (reference)                 | 894 (21.9%)  | 1.00 (., .)         | .               | <b>&lt;.001</b>        |
| 30-39                             | 791 (19.4%)  | 0.95 (0.84, 1.07)   | 0.416           |                        |
| 40-49                             | 1039 (25.4%) | 1.15 (1.03, 1.29)   | 0.017           |                        |
| 50-64                             | 1233 (30.2%) | 1.31 (1.17, 1.47)   | <b>&lt;.001</b> |                        |
| 65+                               | 128 (3.1%)   | 1.65 (1.31, 2.08)   | <b>&lt;.001</b> |                        |
| <b>Conditioning regimen / ATG</b> |              |                     |                 |                        |
| (MA)BU+CU+/-others (reference)    | 1033 (25.3%) | 1.00 (., .)         | .               | <b>0.007</b>           |
| (MA)ATG+BU+/-CY+/-FLU+/-others    | 700 (17.1%)  | 1.10 (0.97, 1.25)   | 0.119           |                        |
| (MA)ATG+TBI+/-CY+/-others         | 308 (7.5%)   | 1.16 (0.98, 1.38)   | 0.083           |                        |
| (MA)BU+FLU+/-others               | 392 (9.6%)   | 1.07 (0.92, 1.24)   | 0.403           |                        |
| (MA)TBI+/-CY+/-others             | 1487 (36.4%) | 1.22 (1.10, 1.36)   | <b>&lt;.001</b> |                        |
| (MA)TBI+ETOP+/-others             | 78 (1.9%)    | 1.12 (0.83, 1.50)   | 0.451           |                        |
| (MA)others                        | 87 (2.1%)    | 1.35 (1.05, 1.73)   | 0.020           |                        |
| <b>Disease</b>                    |              |                     |                 |                        |
| AML (reference)                   | 2224 (54.4%) | 1.00 (., .)         | .               | <b>0.002</b>           |
| ALL                               | 773 (18.9%)  | 1.07 (0.96, 1.20)   | 0.230           |                        |
| CML                               | 533 (13.0%)  | 1.10 (0.97, 1.24)   | 0.136           |                        |
| MDS                               | 555 (13.6%)  | 0.81 (0.71, 0.92)   | <b>0.001</b>    |                        |
| <b>Disease status</b>             |              |                     |                 |                        |
| Early (reference)                 | 1996 (48.9%) | 1.00 (., .)         | .               | <b>&lt;.001</b>        |
| Advanced                          | 1041 (25.5%) | 2.04 (1.86, 2.24)   | <b>&lt;.001</b> |                        |
| Intermediate                      | 1002 (24.5%) | 1.14 (1.03, 1.25)   | 0.010           |                        |
| Missing                           | 46 (1.1%)    | 1.30 (0.89, 1.91)   | 0.175           |                        |
| <b>Donor type</b>                 |              |                     |                 |                        |

|                                    |              |                   |                 |                 |
|------------------------------------|--------------|-------------------|-----------------|-----------------|
| 7/8-matched URD (reference)        | 947 (23.2%)  | 1.00 (., .)       | .               | <b>&lt;.001</b> |
| 8/8-matched URD                    | 3138 (76.8%) | 0.82 (0.75, 0.90) | <b>&lt;.001</b> |                 |
| <b>Karnofsky performance score</b> |              |                   |                 |                 |
| <90 (reference)                    | 1246 (30.5%) | 1.00 (., .)       | .               | <b>&lt;.001</b> |
| 90-100                             | 2570 (62.9%) | 0.79 (0.72, 0.86) | <b>&lt;.001</b> |                 |
| Missing                            | 269 (6.6%)   | 0.81 (0.68, 0.95) | <b>0.009</b>    |                 |
| <b>Sorrer co-morbidity index</b>   |              |                   |                 |                 |
| 0-1 (reference)                    | 868 (21.2%)  | 1.00 (., .)       | .               | <b>0.011</b>    |
| >=2                                | 822 (20.1%)  | 1.10 (0.97, 1.25) | 0.126           |                 |
| Missing                            | 40 (1.0%)    | 0.69 (0.43, 1.11) | 0.127           |                 |
| N/A Prior to 2007                  | 2355 (57.6%) | 1.16 (1.04, 1.30) | <b>0.006</b>    |                 |
| <b>Unrelated donor age, years</b>  |              |                   |                 |                 |
| 18-32 (reference)                  | 1988 (48.7%) | 1.00 (., .)       | .               | <b>0.004</b>    |
| 33-49                              | 1732 (42.4%) | 1.09 (1.01, 1.19) | 0.028           |                 |
| 50-60                              | 257 (6.3%)   | 1.29 (1.11, 1.50) | <b>0.001</b>    |                 |
| Missing                            | 108 (2.6%)   | 0.91 (0.70, 1.19) | 0.510           |                 |

---

### Pairwise comparisons

|                        | <i>HR (%95 CI)</i> | <i>P-value</i> |
|------------------------|--------------------|----------------|
| CsA + MMF vs Tac + MTX | 1.41 (1.04 - 1.91) | 0.028          |
| CsA + MMF vs CsA + MTX | 1.35 (0.99 - 1.84) | 0.060          |
| CsA + MMF vs Tac + MMF | 1.31 (0.94 - 1.81) | 0.106          |
| CsA + MTX vs Tac + MTX | 1.04 (0.95 - 1.15) | 0.389          |
| CsA + MTX vs Tac + MMF | 0.97 (0.84 - 1.12) | 0.679          |
| Tac + MMF vs Tac + MTX | 1.08 (0.95 - 1.22) | 0.252          |

**Supplementary Table: Treatment-related Mortality; Myeloablative, Unrelated donor**

| <i>Parameter</i>                      | <i>N(%)</i>  | <i>Est (%95 CI)</i> | <i>P-value</i>  | <i>Overall P-value</i> |
|---------------------------------------|--------------|---------------------|-----------------|------------------------|
| <b>GVHD prophylaxis &lt; 4 months</b> |              |                     |                 |                        |
| Tac+MTX                               |              | 1.00(., .)          | .               | <b>0.0001</b>          |
| CSA+MMF                               |              | 3.09 (2.00, 4.77)   | <b>&lt;.001</b> |                        |
| CSA+MTX                               |              | 1.24 (1.02, 1.51)   | 0.030           |                        |
| Tac+MMF                               |              | 1.02 (0.77, 1.36)   | 0.896           |                        |
| <b>GVHD prophylaxis ≥ 4 months</b>    |              |                     |                 |                        |
| Tac+MTX                               |              | 1.00(., .)          | .               | <b>0.011</b>           |
| CSA+MMF                               |              | 0.89 (0.42, 1.90)   | 0.763           |                        |
| CSA+MTX                               |              | 1.00 (0.84, 1.20)   | 0.979           |                        |
| Tac+MMF                               |              | 1.45 (1.16, 1.81)   | <b>0.001</b>    |                        |
| <b>Age at transplant, years</b>       |              |                     |                 |                        |
| 18-29 (reference)                     | 894 (21.9%)  | 1.00 (, )           |                 | <b>&lt;.001</b>        |
| 30-39                                 | 791 (19.4%)  | 1.10 (0.92, 1.31)   | 0.309           |                        |
| 40-49                                 | 1038 (25.4%) | 1.33 (1.12, 1.57)   | <b>&lt;.001</b> |                        |
| 50-64                                 | 1233 (30.2%) | 1.71 (1.44, 2.02)   | <b>&lt;.001</b> |                        |
| 65+                                   | 128 (3.1%)   | 2.00 (1.41, 2.83)   | <b>&lt;.001</b> |                        |
| <b>Conditioning regimen / ATG</b>     |              |                     |                 |                        |
| (MA)BU+CU+/-others (reference)        | 1032 (25.3%) | 1.00 (, )           |                 | <b>&lt;.001</b>        |
| (MA)ATG+BU+/-CY+/-FLU+/-others        | 700 (17.1%)  | 0.93 (0.77, 1.12)   | 0.448           |                        |
| (MA)ATG+TBI+/-CY+/-others             | 308 (7.5%)   | 1.11 (0.86, 1.43)   | 0.408           |                        |
| (MA)BU+FLU+/-others                   | 392 (9.6%)   | 0.98 (0.78, 1.23)   | 0.867           |                        |
| (MA)TBI+/-CY+/-others                 | 1487 (36.4%) | 1.35 (1.16, 1.56)   | <b>&lt;.001</b> |                        |
| (MA)TBI+ETOP+/-others                 | 78 (1.9%)    | 1.75 (1.22, 2.52)   | <b>0.002</b>    |                        |
| (MA)others                            | 87 (2.1%)    | 1.36 (0.93, 2.00)   | 0.112           |                        |
| <b>Disease</b>                        |              |                     |                 |                        |
| AML (reference)                       | 2223 (54.4%) | 1.00 (, )           |                 | <b>0.004</b>           |
| ALL                                   | 773 (18.9%)  | 1.08 (0.92, 1.27)   | 0.346           |                        |
| CML                                   | 533 (13.1%)  | 1.32 (1.12, 1.55)   | <b>&lt;.001</b> |                        |
| MDS                                   | 555 (13.6%)  | 1.19 (1.00, 1.42)   | 0.048           |                        |
| <b>Disease status</b>                 |              |                     |                 |                        |
| Early (reference)                     | 1995 (48.8%) | 1.00 (, )           |                 | <b>&lt;.001</b>        |
| Advanced                              | 1041 (25.5%) | 1.33 (1.16, 1.53)   | <b>&lt;.001</b> |                        |
| Intermediate                          | 1002 (24.5%) | 1.00 (0.87, 1.14)   | 0.945           |                        |
| Missing                               | 46 (1.1%)    | 1.06 (0.63, 1.79)   | 0.820           |                        |
| <b>Donor type</b>                     |              |                     |                 |                        |
| 8/8-matched (reference)               | 3137 (76.8%) | 1.00 (, )           |                 | <b>&lt;.001</b>        |
| 7/8-matched                           | 947 (23.2%)  | 1.43 (1.27, 1.62)   | <b>&lt;.001</b> |                        |
| <b>Donor-recipient CMV match</b>      |              |                     |                 |                        |
| -/- (reference)                       | 1220 (29.9%) | 1.00 (, )           |                 | <b>0.006</b>           |
| +/+                                   | 847 (20.7%)  | 1.20 (1.02, 1.41)   | 0.028           |                        |
| +/-                                   | 410 (10.0%)  | 1.17 (0.96, 1.43)   | 0.114           |                        |

| <i>Parameter</i>                   | <i>N(%)</i>  | <i>Est (%95 CI)</i> | <i>P-value</i>  | <i>Overall P-value</i> |
|------------------------------------|--------------|---------------------|-----------------|------------------------|
| -/+                                | 1415 (34.6%) | 1.31 (1.14, 1.51)   | <b>&lt;.001</b> |                        |
| Missing                            | 192 (4.7%)   | 1.21 (0.93, 1.56)   | 0.157           |                        |
| <b>Karnofsky performance score</b> |              |                     |                 |                        |
| <90 (reference)                    | 1245 (30.5%) | 1.00 (, )           |                 | <b>&lt;.001</b>        |
| 90-100                             | 2570 (62.9%) | 0.76 (0.67, 0.85)   | <b>&lt;.001</b> |                        |
| Missing                            | 269 (6.6%)   | 0.67 (0.53, 0.86)   | <b>0.001</b>    |                        |
| <b>Race</b>                        |              |                     |                 |                        |
| Caucasian (reference)              | 3756 (92.0%) | 1.00 (, )           |                 | <b>0.032</b>           |
| Missing                            | 102 (2.5%)   | 1.44 (1.07, 1.94)   | 0.015           |                        |
| Non-Caucasian                      | 226 (5.5%)   | 1.15 (0.91, 1.46)   | 0.252           |                        |
| <b>Sex</b>                         |              |                     |                 |                        |
| Male (reference)                   | 2224 (54.5%) | 1.00 (, )           |                 | <b>0.001</b>           |
| Female                             | 1860 (45.5%) | 0.83 (0.74, 0.93)   | <b>0.001</b>    |                        |
| <b>Unrelated donor age, years</b>  |              |                     |                 |                        |
| 18-32 (reference)                  | 1988 (48.7%) | 1.00 (, )           |                 | <b>&lt;.001</b>        |
| 33-49                              | 1732 (42.4%) | 1.24 (1.11, 1.39)   | <b>&lt;.001</b> |                        |
| 50+                                | 257 (6.3%)   | 1.49 (1.21, 1.85)   | <b>&lt;.001</b> |                        |
| Missing                            | 107 (2.6%)   | 0.81 (0.54, 1.22)   | 0.321           |                        |
| <b>Year of transplant</b>          |              |                     |                 |                        |
| 2000-2004 (reference)              | 1098 (26.9%) | 1.00 (, )           |                 | <b>0.012</b>           |
| 2005-2008                          | 1677 (41.1%) | 0.92 (0.79, 1.06)   | 0.223           |                        |
| 2009-2013                          | 1309 (32.1%) | 0.77 (0.65, 0.92)   | <b>0.004</b>    |                        |

#### Pairwise Comparisons

|                                 | <i>HR (95%CI)</i> | <i>P-value</i> |
|---------------------------------|-------------------|----------------|
| CsA+ MMF vs.CsA+MTX < 4 months  | 2.49 (1.58-3.91)  | <.0001         |
| Tac+ MMF vs.CsA+MTX < 4 months  | 0.82 (0.60-1.26)  | 0.2209         |
| Tac+ MMF vs.CsA+ MMF < 4 months | 0.33 (0.20-0.54)  | <.0001         |
| CsA+ MMF vs.CsA+MTX ≥ 4 months  | 0.89 (0.41-1.91)  | 0.7609         |
| Tac+ MMF vs.CsA+MTX ≥ 4 months  | 1.45 (1.12-1.87)  | 0.0053         |
| Tac+ MMF vs.CsA+ MMF ≥ 4 months | 1.63 (0.75-2.54)  | 0.2196         |

**Supplementary Tables: Relapse, Myeloablative, Unrelated donor**

| <i>Parameter</i>                   | <i>N(%)</i>  | <i>Est (95% CI)</i> | <i>P-value</i>  | <i>Overall P-value</i> |
|------------------------------------|--------------|---------------------|-----------------|------------------------|
| <b>GVHD prophylaxis</b>            |              |                     |                 |                        |
| Tac + MTX (reference)              | 2652 (64.9%) | 1.00 (., .)         | .               | 0.729                  |
| CsA + MMF                          | 64 (1.6%)    | 0.81 (0.50, 1.32)   | 0.398           |                        |
| CsA + MTX                          | 954 (23.4%)  | 0.97 (0.85, 1.12)   | 0.699           |                        |
| Tac + MMF                          | 415 (10.2%)  | 0.93 (0.78, 1.12)   | 0.449           |                        |
| <b>Age at transplant, years</b>    |              |                     |                 |                        |
| 18-29 (reference)                  | 894 (21.9%)  | 1.00 (., .)         | .               | <b>0.042</b>           |
| 30-39                              | 791 (19.4%)  | 0.85 (0.72, 1.01)   | 0.066           |                        |
| 40-49                              | 1039 (25.4%) | 1.02 (0.88, 1.20)   | 0.767           |                        |
| 50-64                              | 1233 (30.2%) | 1.03 (0.87, 1.20)   | 0.757           |                        |
| 65+                                | 128 (3.1%)   | 1.33 (0.98, 1.83)   | 0.070           |                        |
| <b>Conditioning regimen / ATG</b>  |              |                     |                 |                        |
| (MA)BU+CU+/-others (reference)     | 1033 (25.3%) | 1.00 (., .)         | .               | <b>0.016</b>           |
| (MA)ATG+BU+/-CY+/-FLU+/-others     | 700 (17.1%)  | 1.23 (1.04, 1.46)   | 0.013           |                        |
| (MA)ATG+TBI+/-CY+/-others          | 308 (7.5%)   | 1.14 (0.91, 1.44)   | 0.261           |                        |
| (MA)BU+FLU+/-others                | 392 (9.6%)   | 1.16 (0.94, 1.43)   | 0.157           |                        |
| (MA)TBI+/-CY+/-others              | 1487 (36.4%) | 1.11 (0.95, 1.28)   | 0.181           |                        |
| (MA)TBI+ETOP+/-others              | 78 (1.9%)    | 0.55 (0.33, 0.93)   | 0.026           |                        |
| (MA)others                         | 87 (2.1%)    | 1.36 (0.97, 1.89)   | 0.070           |                        |
| <b>Disease</b>                     |              |                     |                 |                        |
| AML (reference)                    | 2224 (54.4%) | 1.00 (., .)         | .               | <b>&lt;.001</b>        |
| ALL                                | 773 (18.9%)  | 1.08 (0.92, 1.26)   | 0.363           |                        |
| CML                                | 533 (13.0%)  | 0.83 (0.69, 1.01)   | 0.059           |                        |
| MDS                                | 555 (13.6%)  | 0.55 (0.46, 0.67)   | <b>&lt;.001</b> |                        |
| <b>Disease status</b>              |              |                     |                 |                        |
| Early (reference)                  | 1996 (48.9%) | 1.00 (., .)         | .               | <b>&lt;.001</b>        |
| Advanced                           | 1041 (25.5%) | 2.99 (2.64, 3.40)   | <b>&lt;.001</b> |                        |
| Intermediate                       | 1002 (24.5%) | 1.32 (1.15, 1.52)   | <b>&lt;.001</b> |                        |
| Missing                            | 46 (1.1%)    | 1.66 (0.95, 2.91)   | 0.078           |                        |
| <b>Karnofsky performance score</b> |              |                     |                 |                        |
| <90 (reference)                    | 1246 (30.5%) | 1.00 (., .)         | .               | <b>0.001</b>           |

|         |              |                   |                 |
|---------|--------------|-------------------|-----------------|
| 90-100  | 2570 (62.9%) | 0.81 (0.72, 0.91) | <b>&lt;.001</b> |
| Missing | 269 (6.6%)   | 0.92 (0.74, 1.14) | 0.455           |

**Pairwise comparisons**

|                        | <i>HR (%95 CI)</i> | <i>P-value</i> |
|------------------------|--------------------|----------------|
| CsA + MMF vs Tac + MTX | 0.81 (0.50 - 1.32) | 0.398          |
| CsA + MMF vs CsA + MTX | 0.83 (0.50 - 1.37) | 0.472          |
| CsA + MMF vs Tac + MMF | 0.87 (0.52 - 1.45) | 0.592          |
| CsA + MTX vs Tac + MTX | 0.97 (0.85 - 1.12) | 0.699          |
| CsA + MTX vs Tac + MMF | 1.04 (0.84 - 1.29) | 0.692          |
| Tac + MMF vs Tac + MTX | 0.93 (0.78 - 1.12) | 0.449          |
